# Supplementary material for: Cytokine Responses to Novel Antigens in an Indian Population Living in an Area Endemic for Visceral Leishmaniasis
Source: PubMed Central journal article supplement (PMC3493615; doi:10.1371/journal.pntd.0001874), 2012-10-25

# Supplementary Figure S1

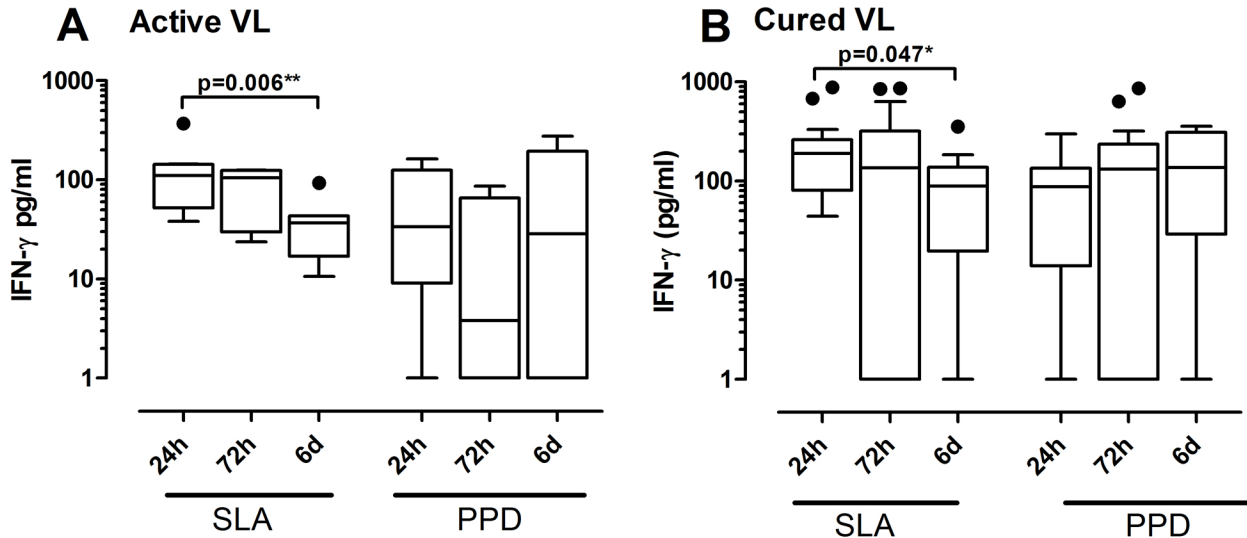

Supplement: pntd.0001874.s001.pdf [file pntd.0001874.s001.pdf]
