# Supplementary material for: Cytokine Responses to Novel Antigens in an Indian Population Living in an Area Endemic for Visceral Leishmaniasis
Source: PubMed Central journal article supplement (PMC3493615; doi:10.1371/journal.pntd.0001874), 2012-10-25
Supplement: pntd.0001874.s007.pdf [file pntd.0001874.s007.pdf]

**Table S2.** IFN- $\gamma$  responses in EHC +ve (EC-01 to EC-20), active VL (VL-1 to VL-8) and EHC-ve (EC-42 to EC-50) individuals at 72 hours after stimulation of whole blood *ex vivo* with candidate vaccine antigens (peptide pools; 5  $\mu$ g/mL), SLA (10  $\mu$ g/mL), PPD (5  $\mu$ g/mL), or mitogen PHA (5  $\mu$ g/mL). IFN- $\gamma$  levels were measured by ELISA.

| <b>Mitogen or <i>Leishmania</i> Antigen</b> |             |             |            |            |            |            |                |               |               |            |            |            |            |
|---------------------------------------------|-------------|-------------|------------|------------|------------|------------|----------------|---------------|---------------|------------|------------|------------|------------|
| <b>ID</b>                                   | <b>PHA</b>  | <b>SLA</b>  | <b>R71</b> | <b>Q51</b> | <b>L37</b> | <b>N52</b> | <b>L302.06</b> | <b>J89</b>    | <b>M18</b>    | <b>J41</b> | <b>M22</b> | <b>M63</b> | <b>M57</b> |
|                                             |             |             | 100%       | 100%       | 99%        | 94%        | 90%            | 87%           | 78%           | 73%        | 61%        | 54%        | 35%        |
| EC-01                                       | +++++       | +           | -          | +          | +          | +          | -              | -             | +             | +          | -          | +          | +          |
| EC-02                                       | +++++       | ++++        | -          | -          | -          | -          | -              | -             | +             | -          | +          | -          | -          |
| EC-03                                       | +++++       | ++++        | -          | -          | +          | -          | -              | -             | -             | -          | -          | -          | -          |
| EC-04                                       | +++++       | ++++        | +          | -          | +          | +          | +              | +             | -             | -          | -          | +          | -          |
| EC-05                                       | +++++       | +++         | -          | -          | +          | -          | -              | -             | -             | +          | -          | -          | -          |
| EC-06                                       | +++++       | ++++        | +          | -          | ++         | +          | -              | -             | -             | +          | -          | -          | -          |
| EC-07                                       | +++++       | +           | ++         | -          | +          | +          | -              | -             | -             | +          | +          | -          | -          |
| EC-08                                       | +++++       | ++++        | ++         | -          | -          | +          | -              | -             | -             | -          | -          | -          | -          |
| EC-09                                       | +++++       | +++         | +          | -          | +          | +          | -              | -             | -             | +          | +          | -          | -          |
| EC-10                                       | +++++       | +++         | ++         | -          | +          | -          | -              | -             | -             | +          | +          | -          | -          |
| EC-11                                       | +++++       | ++++        | -          | -          | -          | ++         | -              | -             | -             | -          | -          | -          | -          |
| EC-12                                       | +++++       | ++++        | ++         | -          | +++        | -          | -              | -             | -             | +          | +          | -          | -          |
| EC-13                                       | +++++       | ++++        | -          | ++         | -          | -          | -              | -             | -             | -          | -          | -          | -          |
| EC-14                                       | +++++       | ++++        | +          | -          | +          | +          | -              | -             | -             | +          | -          | -          | -          |
| EC-15                                       | +++++       | ++++        | -          | -          | +          | -          | -              | -             | -             | +          | -          | -          | -          |
| EC-16                                       | +++++       | ++++        | +          | +          | ++         | ++         | +              | -             | -             | +          | +          | -          | -          |
| EC-17                                       | +++++       | ++++        | -          | -          | -          | +          | +              | -             | -             | +          | -          | -          | -          |
| EC-18                                       | +++++       | +           | +          | -          | -          | -          | -              | -             | -             | -          | +          | -          | -          |
| EC-19                                       | +++++       | ++          | +          | -          | +          | ++         | -              | -             | -             | +          | +          | -          | -          |
| EC-20                                       | +++++       | -           | +          | +          | -          | -          | -              | -             | -             | -          | -          | -          | -          |
| <b>◆◆</b>                                   | <b>100%</b> | <b>95 %</b> | <b>60%</b> | <b>20%</b> | <b>65%</b> | <b>55%</b> | <b>15%</b>     | <b>5%</b>     | <b>10%</b>    | <b>60%</b> | <b>40%</b> | <b>10%</b> | <b>5%</b>  |
| VL-1                                        | +++++       | ++          | +          | +          | ++         | +          | -              | +             | +             | +          | +          | +          | -          |
| VL-2                                        | +++++       | +           | -          | -          | -          | -          | -              | +             | -             | -          | -          | -          | -          |
| VL-3                                        | +++++       | ++          | +          | -          | ++         | -          | -              | +             | +             | +          | +          | +          | -          |
| VL-4                                        | +++         | ++          | -          | -          | -          | -          | -              | -             | -             | -          | -          | +          | -          |
| VL-5                                        | +++++       | ++          | -          | -          | -          | -          | -              | -             | -             | -          | -          | -          | -          |
| VL-6                                        | +++++       | ++          | +          | -          | -          | -          | ++             | -             | -             | -          | -          | -          | -          |
| VL-7                                        | +++++       | +           | -          | -          | +          | -          | -              | -             | -             | -          | -          | +          | -          |
| VL-8                                        | +++         | +           | -          | -          | -          | -          | -              | -             | -             | -          | -          | -          | -          |
| <b>◆◆</b>                                   | <b>100%</b> | <b>100%</b> | <b>37%</b> | <b>12%</b> | <b>37%</b> | <b>12%</b> | <b>12%</b>     | <b>37.5 %</b> | <b>28.6 %</b> | <b>25%</b> | <b>25%</b> | <b>50%</b> | <b>0%</b>  |
| EC-42                                       | +++++       | -           | +          | -          | +          | -          | -              | -             | -             | -          | -          | +          | -          |
| EC-43                                       | ++++        | -           | +          | -          | +          | +          | +              | +             | -             | +          | +          | +          | -          |
| EC-44                                       | ++++        | -           | -          | -          | -          | +          | -              | -             | +             | -          | +          | +          | -          |
| EC-45                                       | ++++        | -           | +          | -          | +          | -          | -              | -             | -             | +          | +          | +          | -          |
| EC-46                                       | ++          | -           | -          | -          | -          | -          | -              | -             | -             | -          | -          | -          | +          |
| EC-47                                       | ++++        | -           | -          | -          | -          | -          | -              | +             | -             | -          | -          | -          | -          |
| EC-48                                       | ++++        | -           | -          | -          | -          | -          | -              | -             | -             | -          | -          | -          | -          |
| EC-49                                       | ++++        | -           | -          | -          | -          | -          | -              | -             | -             | -          | -          | -          | -          |
| EC-50                                       | +++         | -           | -          | +          | -          | -          | -              | -             | -             | -          | -          | +          | -          |

- = <20pg/ml; + = 20-100pg/ml; ++ = 100-250; +++ = 250-500pg/ml; ++++ = 500-10000pg/ml; +++++ = >10000pg/ml; PHA = Phytohaemagglutinin; PPD = purified protein derivative from *Mycobacterium tuberculosis*; SLA = Soluble *Leishmania* antigen. ◆◆ indicates percent of responders to each antigen in each study group. Percent identity with *L. infantum* sequence at the amino acid level is indicated in the row below candidate vaccine antigens (R71, Q51, etc.), which were originally derived from *L. major* [1].

1. Stober CB, Lange UG, Roberts MT, Gilmartin B, Francis R, et al. (2006) From genome to vaccines for leishmaniasis: screening 100 novel vaccine candidates against murine *Leishmania major* infection. Vaccine 24: 2602-2616.
