# Supplementary material for: Cytokine Responses to Novel Antigens in an Indian Population Living in an Area Endemic for Visceral Leishmaniasis
Source: PLoS Negl Trop Dis. 2012 Oct 25;6(10):e1874. doi: 10.1371/journal.pntd.0001874 (PMC3493615; doi:10.1371/journal.pntd.0001874)
Supplement: Table S1 — IFN-γ responses in individuals cured from VL at 24 hours, 72 hours, and 6 days after stimulation of whole blood ex vivo with candidate vaccine antigens (peptide pools; 5 µg/mL), SLA (10 µg/mL), PPD (5 µg/mL), or mitogen PHA (5 µg/mL). IFN-γ levels were measured by ELISA. Percent identity with L. infantum sequence at the amino acid level is indicated below candidate vaccine antigens (R71, Q51, etc.), which were originally derived from L. major. (PDF) [file pntd.0001874.s006.pdf]

**Table S1.** IFN- $\gamma$  responses in individuals cured from VL at 24 hours, 72 hours, and 6 days after stimulation of whole blood *ex vivo* with candidate vaccine antigens (peptide pools; 5  $\mu$ g/mL), SLA (10  $\mu$ g/mL), PPD (5  $\mu$ g/mL), or mitogen PHA (5  $\mu$ g/mL). IFN- $\gamma$  levels were measured by ELISA. Percent identity with *L. infantum* sequence at the amino acid level is indicated below candidate vaccine antigens (R71, Q51, etc.), which were originally derived from *L. major* [1].

| Mitogen or <i>Leishmania</i> Antigen |        |        |        |             |        |       |              |        |       |            |        |       |            |        |       |                |        |       |            |        |       |            |        |       |            |        |       |            |        |       |            |        |       |             |      |       |
|--------------------------------------|--------|--------|--------|-------------|--------|-------|--------------|--------|-------|------------|--------|-------|------------|--------|-------|----------------|--------|-------|------------|--------|-------|------------|--------|-------|------------|--------|-------|------------|--------|-------|------------|--------|-------|-------------|------|-------|
|                                      | P<br>H | P<br>P | S<br>L | R71<br>100% |        |       | Q 51<br>100% |        |       | L37<br>99% |        |       | N52<br>94% |        |       | L302.06<br>90% |        |       | J89<br>87% |        |       | M18<br>78% |        |       | J41<br>73% |        |       | M22<br>61% |        |       | M63<br>54% |        |       | M 57<br>35% |      |       |
| S.N.                                 | A      | D      | A      | 24 hrs      | 72 hrs | Day-6 | 24 hrs       | 72 hrs | Day-6 | 24 hrs     | 72 hrs | Day-6 | 24 hrs     | 72 hrs | Day-6 | 24 hrs         | 72 hrs | Day-6 | 24 hrs     | 72 hrs | Day-6 | 24 hrs     | 72 hrs | Day-6 | 24 hrs     | 72 hrs | Day-6 | 24 hrs     | 72 hrs | Day-6 | 24 hrs     | 72 hrs | Day-6 |             |      |       |
| PT-1                                 | ++++   | -      | +      | -           | -      | -     | -            | -      | -     | -          | -      | -     | +          | +      | +     | +              | -      | -     | +          | +      | -     | -          | +      | -     | -          | +      | +     | -          | -      | +     | -          | -      | -     | -           |      |       |
| PT-2                                 | +++++  | +++    | +++    | +           | -      | ++    | -            | -      | -     | +          | -      | -     | +          | -      | -     | ++             | +      | -     | -          | -      | -     | +          | -      | -     | -          | +      | -     | -          | -      | -     | ++         | +      | -     | -           |      |       |
| PT-3                                 | +++++  | ++     | ++     | +           | -      | -     | +            | -      | -     | +          | -      | -     | +          | -      | -     | -              | -      | -     | +          | -      | -     | +          | -      | -     | +          | +      | -     | -          | +      | -     | -          | -      | -     |             |      |       |
| PT-4                                 | +++++  | -      | ++++   | -           | -      | -     | -            | -      | -     | -          | -      | -     | -          | -      | -     | -              | -      | -     | -          | -      | -     | +          | -      | -     | -          | +      | -     | -          | -      | -     | -          | -      | -     | -           |      |       |
| PT-5                                 | ++++   | ++++   | ++     | +++         | +      | -     | -            | -      | -     | +          | +      | -     | +          | +      | -     | -              | -      | -     | +          | -      | -     | +          | +      | -     | -          | -      | -     | -          | -      | -     | +          | +      | -     | -           |      |       |
| PT-6                                 | ++++   | -      | ++     | ++          | +      | +     | -            | +      | -     | +          | +      | ++    | ++         | +      | -     | -              | -      | +     | +          | +      | -     | -          | -      | +     | +          | ++     | +     | -          | +      | +     | +          | -      | -     | -           |      |       |
| PT-7                                 | ++++   | +      | ++++   | +           | ++     | +     | -            | -      | -     | +          | +      | +     | +          | +      | -     | -              | -      | +     | +          | +      | +     | +          | +      | +     | +          | +      | +     | -          | +      | +     | -          | -      | -     | -           |      |       |
| PT-8                                 | +++++  | ++++   | ++     | ++          | +      | +     | -            | -      | -     | +          | -      | +     | +          | -      | -     | -              | -      | -     | -          | -      | -     | +          | +      | +     | +          | +      | +     | +          | -      | -     | -          | -      | -     | -           |      |       |
| PT-9                                 | +++++  | +      | ++     | +           | +      | ++    | +            | +      | -     | +          | +      | +++   | +          | ++     | -     | -              | -      | +     | -          | +      | -     | -          | +      | -     | +++        | +      | +     | -          | -      | +     | +          | -      | -     | +           | -    |       |
| PT-10                                | ++++   | +      | ++     | +           | +      | -     | -            | -      | -     | -          | -      | +     | +          | -      | -     | -              | +      | -     | -          | +      | -     | -          | +      | +     | -          | +      | +     | -          | -      | -     | -          | -      | -     | -           | -    |       |
| PT-11                                | ++++   | +      | ++++   | +           | +      | -     | -            | -      | -     | -          | +      | ++    | -          | -      | -     | -              | -      | -     | -          | -      | -     | -          | -      | +     | +          | +      | +     | -          | -      | -     | -          | -      | -     | -           | -    |       |
| PT-12                                | +++++  | +      | ++++   | +++         | ++     | +     | -            | +      | -     | -          | +      | ++    | ++         | +      | -     | -              | -      | -     | -          | +      | -     | -          | +      | +     | -          | ++     | +     | -          | -      | -     | -          | -      | +     | -           | -    |       |
| PT-13                                | ++++   | -      | +      | +           | ++     | -     | -            | +      | -     | -          | +      | +     | +          | -      | -     | -              | -      | -     | -          | -      | -     | +          | +      | -     | -          | -      | -     | -          | -      | -     | -          | -      | -     | -           | -    |       |
| PT-14                                | +++++  | +      | ++++   | +           | +      | -     | -            | -      | -     | -          | +      | ++    | +          | +      | -     | +              | +      | +     | -          | -      | -     | +          | +      | -     | ++         | +      | +     | +          | +      | +     | -          | -      | -     | +           | -    |       |
| PT-15                                | +++++  | +++    | +      | +           | +      | ++    | +            | +      | -     | +          | +      | ++    | +          | -      | -     | -              | -      | -     | -          | -      | -     | ++         | +      | ++    | +          | +      | +     | -          | -      | -     | -          | -      | +     | -           | -    |       |
| PT-16                                | ++++   | +      | +++    | +           | +      | +     | -            | -      | -     | +          | +      | ++    | +          | -      | -     | +              | +      | +     | -          | -      | -     | -          | +      | +     | +          | +      | +     | -          | -      | -     | -          | -      | +     | -           | +    |       |
|                                      | 100 %  | 75 %   | 100 %  | 87.5%       | 75.0%  | 50.0% | 18.7%        | 31.2%  | 0%    | 56.2%      | 62.5%  | 81.2% | 87.5%      | 53.8%  | 6.2%  | 25%            | 25%    | 18.7% | 18.5%      | 26.6%  | 6.2%  | 37.5%      | 26.6%  | 0%    | 68.7%      | 75.0%  | 37.5% | 81%        | 46.6%  | 6.2%  | 25%        | 18.7%  | 12.5% | 25%         | 6.2% | 18.7% |

- = <20pg/ml; + = 20-100pg/ml; ++ =100-250; +++ = 250-500pg/ml; ++++ = 500-10000pg/ml; +++++ = >10000pg/ml;  
PHA = Phytohaemagglutinin; PPD = purified protein derivative from *Mycobacterium tuberculosis*; SLA = Soluble Leishmania antigen  
1. Stober CB, Lange UG, Roberts MT, Gilmartin B, Francis R, et al. (2006) From genome to vaccines for leishmaniasis: screening 100 novel vaccine candidates against murine Leishmania major infection. Vaccine 24: 2602-2616.
